# Supplementary material for: Carbazole-based bis-imidazole ligand-involved synthesis of inorganic–organic hybrid polyoxometalates as electrochemical sensors for detecting bromate and efficient catalysts for selective oxidation of thioether
Source: Royal Society of Chemistry journal article supplement (doi:10.1039/d1ra08861k), 2022-01-01
Supplement: d1ra08861k1.pdf [file d1ra08861k1.pdf]

## Carbazole-based Bis-Imidazole Ligand-Involved Synthesis of Inorganic-Organic Hybrid Polyoxometalates as Electrochemical Sensors for Detecting Bromate and Efficient Catalysts for Selective Oxidation of Thioether

Xiang Wang,<sup>\*a</sup> Jiafeng Lin,<sup>a</sup> Huan Li,<sup>a</sup> Chenying Wang<sup>a</sup> and Xiuli Wang<sup>\*a</sup>

*College of Chemistry and Materials Engineering, Bohai University, Liaoning Professional Technology Innovation Center of Liaoning Province for Conversion Materials of Solar Cell, Jinzhou, 121000, P. R. China.*

**Table S1** Selected bond lengths (Å) and angles (°) of complexes **1-3**.

| Complex 1        |            |                  |           |
|------------------|------------|------------------|-----------|
| Ni(1)-O(7)       | 2.119(4)   | Ni(1)-O(5)       | 2.191(4)  |
| Ni(1)-N(10)      | 2.058(5)   | Ni(1)-N(9)       | 2.056(5)  |
| Ni(1)-N(8)       | 2.123(5)   | Ni(1)-N(4)       | 2.079(5)  |
| O(7)-Ni(1)-O(5)  | 71.61(14)  | N(10)-Ni(1)-O(7) | 94.09(16) |
| N(10)-Ni(1)-O(5) | 165.68(17) | N(9)-Ni(1)-O(7)  | 87.83(17) |
| N(9)-Ni(1)-O(5)  | 89.21(18)  | N(9)-Ni(1)-N(10) | 89.5(2)   |
| Complex 2        |            |                  |           |
| O(2W)-Cu(1)      | 2.087(4)   | O(8)-Cu(1)       | 2.303(3)  |
| N(4)-Cu(1)       | 1.951(4)   | N(4)-Cu(1)-O(2W) | 91.57(17) |
| O(2W)-Cu(1)-O(8) | 89.84(13)  | N(4)-Cu(1)-O(8)  | 90.57(15) |
| Complex 3        |            |                  |           |
| N(5)-Ni(1)       | 2.051(3)   | N(1)-Ni(1)       | 2.063(4)  |
| Ni(1)-O(1W)      | 2.091(4)   | Ni(1)-O(2W)      | 2.111(3)  |
| Ni(1)-O(5)       | 2.087(3)   | Ni(1)-O(6)       | 2.083(3)  |
| N(5)-Ni(1)-O(2W) | 172.82(14) | N(5)-Ni(1)-O(5)  | 91.01(14) |
| O(5)-Ni(1)-O(1W) | 173.74(15) | O(5)-Ni(1)-O(2W) | 85.46(14) |
| N(5)-Ni(1)-N(1)  | 96.21(14)  | N(5)-Ni(1)-O(1W) | 94.96(16) |

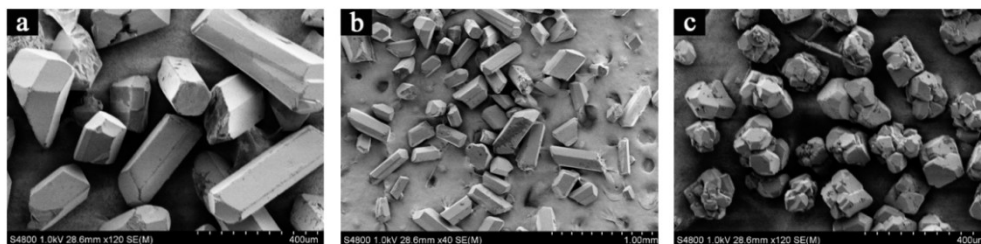

Fig. S1 The SEM images for complexes 1(a), 2(b) and 3(c).

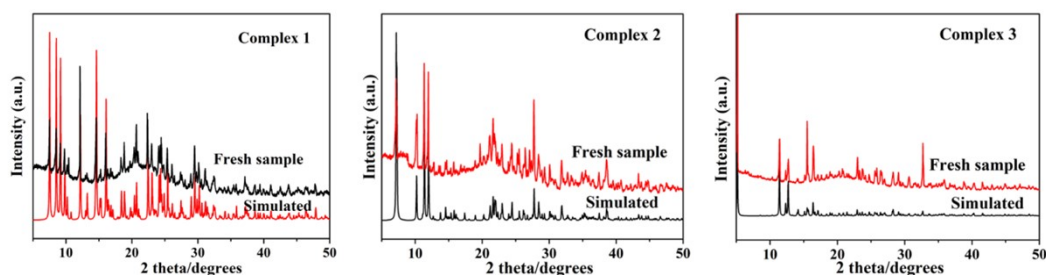

Fig. S2 The PXRD patterns for complexes 1-3.

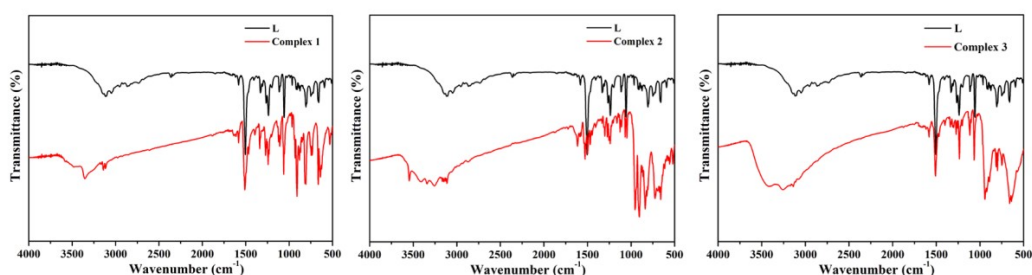

Fig. S3 IR spectra of complexes 1-3.

Table S2 The comparison of LODs of 1–3–CPEs and reported sensors.

| Sensor                                                                                                                                                                  | Concentration (M)                       | Coefficient of association | sensitivity ( $\mu\text{A}\cdot\text{mM}^{-1}$ ) | LOD ( $\mu\text{M}$ ) | ref       |
|-------------------------------------------------------------------------------------------------------------------------------------------------------------------------|-----------------------------------------|----------------------------|--------------------------------------------------|-----------------------|-----------|
| 1–CPE                                                                                                                                                                   | $2\times 10^{-5}$ – $1\times 10^{-3}$   | 0.998                      | 8.58                                             | 0.315                 | this work |
| 2–CPE                                                                                                                                                                   | $2\times 10^{-5}$ – $1\times 10^{-3}$   | 0.999                      | 27.61                                            | 0.098                 | this work |
| 3–CPE                                                                                                                                                                   | $2\times 10^{-5}$ – $1\times 10^{-3}$   | 0.999                      | 0.54                                             | 0.551                 | this work |
| $\{[\text{Cu}_8(\text{H}_2\text{O})_6](\text{dpyh})_4(\alpha\text{-}\gamma\text{-Mo}_8\text{O}_{26})\cdot(\beta\text{-Mo}_8\text{O}_{26})\cdot 8.5\text{H}_2\text{O}\}$ | $1\times 10^{-5}$ – $1\times 10^{-4}$   | 0.998                      | 0.05                                             | 83.2                  | 1         |
| $[\text{CoL}^1(\beta\text{-Mo}_8\text{O}_{26})_{0.5}]$                                                                                                                  | $1\times 10^{-5}$ – $4.2\times 10^{-3}$ | 0.992                      | 0.69                                             | 1503                  | 2         |
| $[\text{Co}(\text{H}_2\text{O})_2\text{L}^2(\beta\text{-Mo}_8\text{O}_{26})_{0.5}]$                                                                                     | $1\times 10^{-5}$ – $9\times 10^{-4}$   | 0.995                      | 8.0                                              | 25.4                  | 2         |
| $[\text{Zn}(\text{HL}_3)_2(\beta\text{-Mo}_8\text{O}_{26})]$                                                                                                            | $1\times 10^{-5}$ – $5\times 10^{-3}$   | 0.999                      | 2.0                                              | 24                    | 2         |

|                                                                                     |                                           |       |       |      |   |
|-------------------------------------------------------------------------------------|-------------------------------------------|-------|-------|------|---|
| $[\text{Ag}_4\text{L}^a_5(\text{SiW}_{12}\text{O}_{40})]\cdot 28\text{H}_2\text{O}$ | $1.2\times 10^{-5}$ – $5.8\times 10^{-4}$ | 0.991 | 12.7  | 5.61 | 3 |
| $[\text{Ag}_3\text{L}^a_4(\text{PW}_{12}\text{O}_{40})]$                            | $3.4\times 10^{-3}$ – $8\times 10^{-3}$   | 0.997 | 101.7 | 16.9 | 3 |
| $(\text{Ni}_4[(\text{P}_8\text{W}_{48}\text{O}_{184})(\text{WO}_2)]^{28-})$         | $1\times 10^{-4}$ – $1\times 10^{-3}$     | 0.998 | 69.4  | 0.2  | 4 |
| NENU-3/CC                                                                           | $5.0\times 10^{-5}$ – $5.6\times 10^{-3}$ | 0.997 | 45.1  | 0.55 | 5 |
| NENU-5/CC                                                                           | $1.5\times 10^{-5}$ – $3.8\times 10^{-5}$ | 0.996 | 18.8  | 1.18 | 5 |
| NENU-3/film                                                                         | $5.0\times 10^{-5}$ – $7.2\times 10^{-4}$ | 0.998 | 0.02  | 12   | 6 |
| Ag/PMO <sub>12</sub> /PBz-modified electrode                                        | $1\times 10^{-3}$ – $7.5\times 10^{-3}$   | 0.999 | 2.2   | 86.3 | 7 |
| $[(\text{C}_3\text{H}_7)_2\text{-bim}]_2[\text{CdCl}_4]$                            | $5\times 10^{-9}$ – $2\times 10^{-8}$     | 0.998 | 0.10  | 0.01 | 8 |

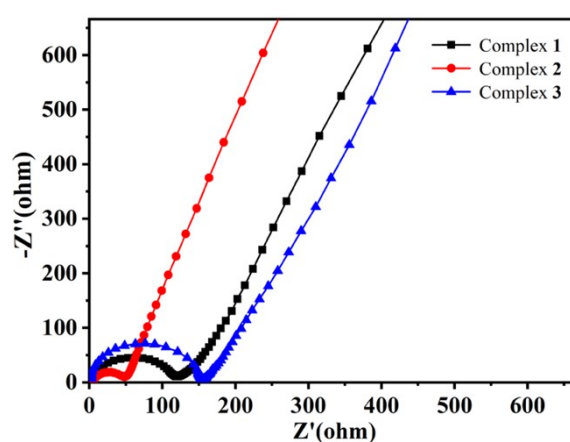

Fig. S4 The EIS spectra of 1–3–based electrodes

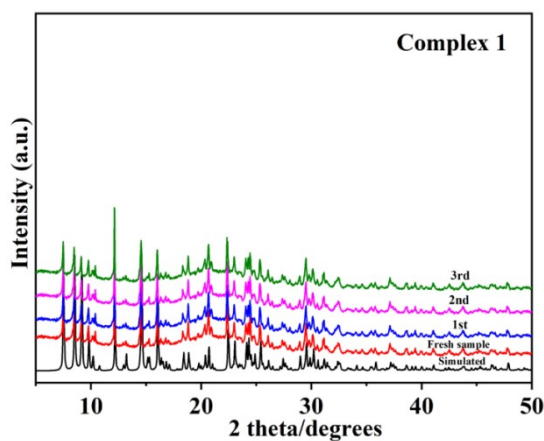

Fig. S5 The PXRD patterns of simulated and recycled after acting as catalyst of **1**.

## References

1. X. L. Wang, J. Y. Zhang, Z. H. Chang, Z. Zhang, X. Wang, H. Y. Lin and Z. W. Cui, *Inorg. Chem.*, 2021, **60**, 3331.

2. X. L. Wang, L. Li, X. Wang and Y. Q. Zhang, *CrystEngComm*, 2021, **23**, 5176.
3. A. X. Tian, J. N. Liu, T. T. Li, Y. Tian, G. Y. Liu and J. Ying, *CrystEngComm*, 2018, **20**, 2940.
4. B. Ali, F. Laffir, L. Kailas, G. Armstrong, R. O'Connell and T. McCormac, *Eur. J. Inorg. Chem.*, 2019, **2019**, 394.
5. Y. N. Zhang, Y. Zhang, L. Li, J. L. Chen, P. Z. Li and W. H. Huang, *J. Electroanal. Chem.*, 2020, **861**, 113939.
6. E. Shi, X. Zou, J. Liu, H. Lin, F. Zhang, S. Shi, F. Liu, G. Zhu and F. Qu, *Dalton. Trans.*, 2016, **45**, 7728.
7. A. Manivel, R. Sivakumar, S. Anandan and M. Ashokkumar, *Electrocatalysis*, 2012, **3**, 22.
8. R. Zhuang, F. Jian and K. Wang, *Ionics*, 2010, **16**, 661.
